# Supplementary material
Source: Copernicus journal article supplement (doi:10.5194/acp-26-5553-2026)
Supplement: Supplementary file 1 [file acp-26-5553-2026-supplement.pdf]

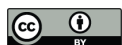

*Supplement of*

## **Impact of the Chinese Spring Festival on PM<sub>2.5</sub> air quality in the Beijing-Tianjin-Hebei and surrounding region: a machine learning-based counterfactual modeling approach**

**Yuan Li et al.**

*Correspondence to:* Qili Dai ([daiql@nankai.edu.cn](mailto:daiql@nankai.edu.cn)) and Yinchang Feng ([fengyc@nankai.edu.cn](mailto:fengyc@nankai.edu.cn))

The copyright of individual parts of the supplement might differ from the article licence.

1 **List of tables**

2 **Table S1.** Analytical instruments/methods, method detection limits (MDLs), and  
3 uncertainty (error fractions) for PM<sub>2.5</sub> chemical species used as PMF inputs.

4 **Table S2.** Summary of the meteorological factor variables downloaded from ERA5.

5 **Table S3.** Comparison of bootstrap diagnostics for PMF solutions with different factor  
6 numbers (6-10 factors).

7 **List of texts**

8 **S1.** Preprocessing of downloaded ERA5 meteorological variables.

9 **S2.** Representativeness of ERA5 meteorological data.

10 **S3.** Modeling details of the ML-Based counterfactual PM<sub>2.5</sub> air quality prediction  
11 framework.

12 **List of figures**

13 **Figure S1.** Learning curve of the ML-Based counterfactual PM<sub>2.5</sub> prediction framework.

14 **Figure S2.** Observed PM<sub>2.5</sub> concentrations and ensemble-based counterfactual  
15 predictions from the XGBoost model, together with their 95% prediction intervals and  
16 the corresponding deviations ( $\Delta = \text{observed} - \text{predicted}$ ).

17 **Figure S3.** SHAP summary plots of feature contributions to the ML counterfactual  
18 PM<sub>2.5</sub> model (upper: feature importance; lower: feature contributions).

19 **Figure S4.** Source profiles of the nine factors resolved by the DN-PMF analysis for the  
20 PM<sub>2.5</sub> pollution episode during New Year's Eve 2024 in Hangzhou.

21 **Figure S5.** Temporal variations of air quality, meteorologically normalized  
22 concentrations, and meteorological factors around the 2024 Spring Festival. In subplots  
23 a, b, and c, the thin lines represent the observed values of pollutants, while the thick  
24 lines indicate the meteorologically normalized concentrations.

25 **Figure S6.** A dramatic surge in the K/EC ratio of PM<sub>2.5</sub> during the 2024 New Year's  
26 Eve: Evidence for firework emissions in Hangzhou.

27 **Figure S7.** Temporal variation of the K/Ba ratio in PM<sub>2.5</sub> during the 2024 New Year's  
28 Eve haze episode in Hangzhou.

29 **Figure S8.** Temporal variations of PM<sub>2.5, MN</sub> and PM<sub>2.5, pre, MN</sub> around the 2024 Lunar  
30 New Year's Eve in Hangzhou.

31 **Figure S9.** Linear regression analysis of hourly PM<sub>2.5</sub> concentrations between the  
32 Wolongqiao site (x-axis) and the Hangzhou city-wide average (14 sites, y-axis) during  
33 the study period (2023/12/20 - 2024/2/20). The strong correlation ( $R^2 = 0.78$ ) supports  
34 the representativeness of the Wolongqiao site in capturing city-scale pollution trends  
35 during the observation period.

36 **Figure S10.** Temporal variations of observed and meteorologically normalized PM<sub>2.5</sub>  
37 concentrations during the 2025 Spring Festival in the "2+26" cities of northern China.

38 **Figure S11.** Temporal variation of NO<sub>2</sub> concentrations in the "2+26" cities of northern  
39 China around the 2025 spring festival. The x-axis shows the lunar calendar days, with  
40 0 representing Chinese New Year's Eve and 1 representing the first day of the Lunar  
41 New Year.

42 **Figure S12.** Temporal variation of CO concentrations in the "2+26" cities of northern  
43 China around the 2025 spring festival. The x-axis shows the lunar calendar days, with

44 0 representing Chinese New Year's Eve and 1 representing the first day of the Lunar  
45 New Year.  
46  
47  
48  
49  
50

51 **Table S1.** Analytical instruments/methods, method detection limits (MDLs), and  
 52 uncertainty (error fractions) for PM<sub>2.5</sub> chemical species used as PMF inputs. Instrument  
 53 calibration and routine QA/QC procedures (multi-point calibration using standards,  
 54 field/laboratory blanks, and replicate analyses) were performed to ensure analytical  
 55 accuracy. The MDLs and error fractions listed in this table were used as PMF model  
 56 inputs.

| Chemical Composition    | Chemical Species              | Analytical Instruments and Methods                             | Method Detection Limit (ug/cm <sup>2</sup> ) | Uncertainty (ErrorFraction) |
|-------------------------|-------------------------------|----------------------------------------------------------------|----------------------------------------------|-----------------------------|
| Elemental species       | Na                            | iCAP 7000 Series ICP-OES spectrometer (Thermo Scientific, USA) | 0.00017584                                   | 0.1                         |
|                         | Mg                            |                                                                | 0.00020096                                   | 0.1                         |
|                         | Al                            |                                                                | 0.00001                                      | 0.1                         |
|                         | Si                            |                                                                | 0.000271296                                  | 0.1                         |
|                         | S                             |                                                                | 0                                            | 0.1                         |
|                         | Cl                            |                                                                | 0.00211008                                   | 0.1                         |
|                         | K                             |                                                                | 0.002841072                                  | 0.1                         |
|                         | Ca                            |                                                                | 0.003062128                                  | 0.1                         |
|                         | Ti                            |                                                                | 0.00001                                      | 0.1                         |
|                         | V                             |                                                                | 0.0054636                                    | 0.1                         |
|                         | Cr                            |                                                                | 0.002755664                                  | 0.1                         |
|                         | Mn                            |                                                                | 0.00145696                                   | 0.1                         |
|                         | Fe                            |                                                                | 0.003225408                                  | 0.1                         |
|                         | Cu                            |                                                                | 0.00236128                                   | 0.1                         |
|                         | Co                            |                                                                | 0.004255328                                  | 0.1                         |
|                         | Zn                            |                                                                | 0.00001                                      | 0.1                         |
|                         | As                            |                                                                | 0.002512                                     | 0.1                         |
|                         | Pb                            |                                                                | 0.010306736                                  | 0.1                         |
|                         | Ba                            |                                                                | 0.00001                                      | 0.1                         |
|                         | Ni                            |                                                                | 0.00105504                                   | 0.1                         |
| Cd                      | 0.010007808                   | 0.1                                                            |                                              |                             |
| Se                      | 0.00001                       | 0.1                                                            |                                              |                             |
| Water-soluble ions      | Na <sup>+</sup>               | 0.0001                                                         | 0.1                                          |                             |
|                         | NH <sub>4</sub> <sup>+</sup>  | 0.1                                                            | 0.0764                                       |                             |
|                         | K <sup>+</sup>                | 0.05                                                           | 0.1                                          |                             |
|                         | Mg <sup>2+</sup>              | 0.01                                                           | 0.15                                         |                             |
|                         | Ca <sup>2+</sup>              | 0.0001                                                         | 0.1                                          |                             |
|                         | Cl <sup>-</sup>               | 0.05                                                           | 0.13                                         |                             |
|                         | NO <sub>3</sub> <sup>-</sup>  | 0.1                                                            | 0.07                                         |                             |
|                         | SO <sub>4</sub> <sup>2-</sup> | 0.08                                                           | 0.0655                                       |                             |
| Carbonaceous components | OC                            | DRI 2001A Thermal/Optical OC/EC analyzer (IMPROVE_A protocol)  | 0.5                                          | 0.1                         |
|                         | EC                            |                                                                | 0.5                                          | 0.2                         |

57  
58  
59  
60  
61

**Table S2.** Summary of the meteorological factor variables downloaded from ERA5. Note: a positive zonal wind means westerly; positive meridional wind means southerly; positive vertical velocity means downward motion.

| Abbreviations | Names of variables          | Units of variables |
|---------------|-----------------------------|--------------------|
| U10           | Zonal wind at 10 m          | m/s                |
| V10           | Meridional wind at 10 m     | m/s                |
| T2            | Temperature at 2 m          | K                  |
| D2            | Dewpoint temperature at 2 m | K                  |
| SSR           | Surface net solar radiation | J/m <sup>2</sup>   |
| TP            | Total precipitation         | m                  |
| BLH           | Boundary layer height       | m                  |
| TCC           | Total cloud cover           | %                  |
| SP            | Surface pressure            | Pa                 |

62  
63  
64  
65  
66  
67  
68

**Table S3.** Comparison of bootstrap diagnostics for PMF solutions with different factor numbers (6-10 factors). The 9-factor solution shows the highest bootstrap mapping stability (96-100%) with no unmapped factors. In contrast, solutions with fewer factors tend to mix multiple sources, whereas the 10-factor solution shows reduced stability and limited improvement in model performance. These results indicate that the 9-factor solution is the most stable and interpretable among the tested solutions.

| BS diagnostics      | 6-factor | 7-factor | 8-factor | 9-factor | 10-factor |
|---------------------|----------|----------|----------|----------|-----------|
| Lowest %BS mapping  | 91       | 94       | 94       | 96       | 94        |
| Highest %BS mapping | 100      | 100      | 100      | 100      | 97        |
| Highest unmapped    | 1        | 0        | 0        | 0        | 0         |

69  
70  
71

## S1. Preprocessing of downloaded ERA5 meteorological variables

72 Surface meteorological variables, including 10-meter zonal wind (U10) and  
73 meridional wind (V10), 2-meter temperature (T2) and dew point temperature (D2),  
74 boundary layer height (BLH), total cloud cover (TCC), total precipitation (TP), surface  
75 pressure (SP), and surface net solar radiation (SSR), were obtained from the ERA5  
76 hourly reanalysis on single levels (Copernicus Climate Data Store,  
77 <https://cds.climate.copernicus.eu/>), spanning 1940 to present with a temporal resolution  
78 of 1 hour and a horizontal resolution of 0.25° × 0.25°. The ERA5 total precipitation  
79 (TP) variable represents the accumulated rainfall within each hour (m h<sup>-1</sup>); for  
80 aggregated analyses, hourly TP values were summed to daily totals. The 10 m surface  
81 wind speed (WS) and direction (WD) were derived from the zonal (U10) and  
82 meridional (V10) wind components using vector synthesis and trigonometric  
83 relationships. Relative humidity (RH) was calculated using Emanuel’s (1994) empirical  
84 saturation vapor pressure formula, expressed as:

85 
$$\ln E = 53.67957 - \frac{6743.769}{T} - 4.8451 \ln T$$

86 Where  $E$  is the vapor pressure (hPa) and  $T$  is the absolute temperature (K). The  
87 formula was applied separately to the 2-m air temperature ( $T_2$ ) and dew point  
88 temperature ( $D_2$ ) to obtain the actual vapor pressure ( $E_a$ ) and saturation vapor pressure  
89 ( $E_s$ ), respectively. Relative humidity was then computed as  $RH = (E_a / E_s) \times 100\%$ .

90  
91

## 92 **S2. Representativeness of ERA5 meteorological data**

93 To evaluate the representativeness of ERA5 meteorological data during the study  
94 period (20 December 2023-16 February 2024), we compared hourly ERA5 variables at  
95 the grid cell centered over downtown Hangzhou (30.2084° N, 120.212° E), which  
96 served as the meteorological inputs for our case study of the 2024 Hangzhou New Year  
97 haze episode, with ground-based observations from the Hangzhou Xiaoshan  
98 International Airport meteorological monitoring site (30.23397° N, 120.43144° E),  
99 located approximately 20 km southeast of the city center. ERA5 shows small mean  
100 biases for near-surface temperature and wind speed ( $\approx 0.36$  °C and 0.40 m/s,  
101 respectively), while wind direction exhibits a modest mean bias ( $\approx 17^\circ$ ), consistent with  
102 the expected spatial smoothing of a 0.25° gridded reanalysis product.

103 Importantly, the strength of ERA5 in the context of this study lies in its ability to  
104 provide a spatially and temporally consistent representation of synoptic-scale  
105 meteorological conditions. In contrast, ground-based meteorological observations are  
106 often highly localized, contain missing or interrupted records, and many key variables  
107 are available only at 3-hour intervals, which restricts their direct use for machine-  
108 learning-based modeling at an hourly resolution; moreover, ERA5 provides a more  
109 comprehensive set of meteorological variables.

110 The reliability of ERA5 as a primary driver for atmospheric modeling is well  
111 documented. According to the comprehensive global evaluation by Hersbach et al.  
112 (2020), ERA5 significantly improves the representation of near-surface meteorological  
113 states and atmospheric dynamics compared to previous reanalysis products, benefiting  
114 from a high-resolution 4D-Var data assimilation system. While localized point-to-grid  
115 comparisons may exhibit high-frequency variability due to spatial smoothing, the core  
116 strength of ERA5 lies in its internal physical consistency and its ability to accurately  
117 capture synoptic-scale transitions. These features are critical for ML-based PM<sub>2.5</sub>  
118 predictions because they ensure that the regional meteorological background, including  
119 essential vertical mixing parameters, is represented with high fidelity.

120 Our counterfactual modeling framework aims to estimate relative changes in  
121 regional PM<sub>2.5</sub> concentrations driven by large-scale meteorological patterns, rather than  
122 to capture hyper-local or sub-grid meteorological extremes. The observed discrepancies,  
123 while inherent to reanalysis data, do not compromise ERA5's capability to characterize  
124 the regional-scale meteorological forcing that underpins our analysis. Therefore, ERA5

125 offers a suitable and robust meteorological foundation for the counterfactual modeling  
126 framework employed in this study.

### 131 **S3. Modeling details of the ML-Based counterfactual PM<sub>2.5</sub> air quality prediction** 132 **framework**

133 For the Hangzhou 2024 Spring Festival modeling dataset, model hyperparameters  
134 were optimized using Bayesian optimization (Optuna, version 4.5.0) with a 5-fold  
135 cross-validation strategy applied to the training set. The objective function maximized  
136 the coefficient of determination ( $R^2$ ) obtained from cross-validation.

137 The optimal hyperparameters were as follows:

138  $n\_estimators = 246$ ,  $learning\_rate = 0.067$ ,  $max\_depth = 8$ ,  $min\_child\_weight = 2$ ,  
139  $subsample = 0.76$ ,  $colsample\_bytree = 0.77$ ,  $reg\_alpha = 0.94$ , and  $reg\_lambda = 0.56$ .

140 The mean  $R^2$  across the cross-validation folds was 0.956.

141 On the independent test set, the model achieved an  $R^2$  of 0.969 with an RMSE of  
142  $6.72 \mu\text{g m}^{-3}$ .

143 Figure S1 shows the learning curve of the Bayesian-optimized XGBoost model.  
144 The training  $R^2$  (red line) remains close to 1.0 across all training sizes, while the cross-  
145 validation  $R^2$  (green line) increases steadily with more training data and stabilizes  
146 around 0.95. This indicates that the model achieves strong generalization without  
147 significant overfitting, and that the available dataset (~1000 samples) is sufficient for  
148 reliable model training.

149 Figure S2 illustrates the observed PM<sub>2.5</sub> concentrations together with the  
150 ensemble-based counterfactual predictions, their 95% prediction intervals, and the  
151 deviations ( $\Delta = \text{observed} - \text{predicted}$ ). To quantify predictive uncertainty, we  
152 implemented an ensemble-based bootstrap approach. Fifty XGBoost models with  
153 identical hyperparameters were trained on bootstrap-resampled versions of the training  
154 set, generating an ensemble of counterfactual BAU predictions. The ensemble mean  
155 was used as the point estimate, and the 2.5 th-97.5 th percentile range of the ensemble  
156 distribution was taken as the 95% prediction interval. The ensemble-mean predictions  
157 achieved an  $R^2$  of approximately 0.95 on the test set, slightly lower than the single-  
158 model performance but providing well-calibrated uncertainty estimates.

159 Figure S3 illustrates the SHAP (SHapley Additive exPlanations) summary  
160 combining a beeswarm distribution and mean absolute SHAP bar plot. The horizontal  
161 axis represents each feature's SHAP value contribution to model prediction, while the  
162 color gradient (blue-red) denotes the corresponding feature value (low-high).

163 Among all predictors, `date_unix` and `length` exerted the most substantial influences  
164 on model behavior, but with distinct physical interpretations. The feature `date_unix`,  
165 representing the long-term temporal trend associated with emission dynamics,  
166 exhibited predominantly negative SHAP values as time progressed throughout the  
167 study period. This pattern indicates that emissions during the Chinese New Year period

168 were generally lower than those observed before the festival, reflecting reduced  
169 anthropogenic activity.

170 Similarly, length, denoting the trajectory length, showed an overall negative  
171 correlation with its SHAP contribution, implying that shorter back-trajectories were  
172 linked to higher predicted concentrations. This suggests that during the Spring Festival  
173 period, local emissions within Hangzhou dominated the observed pollution levels,  
174 while the influence of surrounding regional transport was comparatively minor. The  
175 categorical features cluster C1-C6, which represent six typical air-mass transport  
176 clusters along with their relative contributions, further support this interpretation.  
177 Among them, clusters C5 and C4, which exerted the strongest influence on local  
178 conditions, were associated with negative SHAP contributions, indicating that these  
179 trajectories likely brought cleaner air masses into Hangzhou.

180  
181  
182  
183  
184  
185  
186

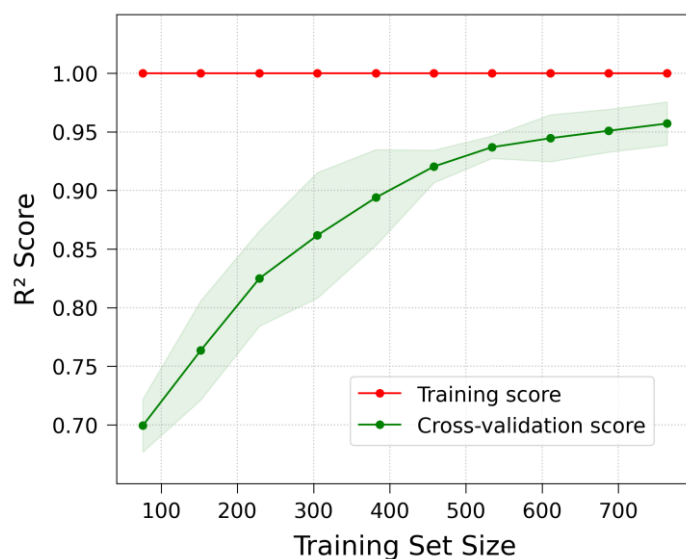

187  
188  
189

**Figure S1.** Learning curve of the ML-Based counterfactual PM<sub>2.5</sub> prediction framework.

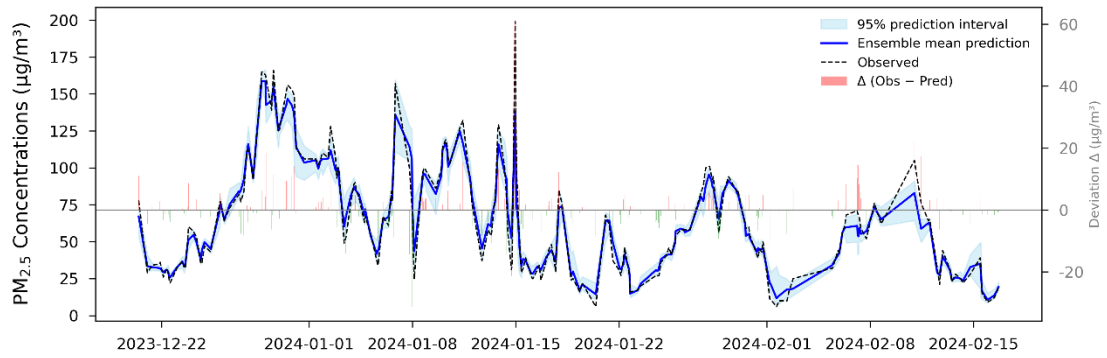

190

191 **Figure S2.** Observed PM<sub>2.5</sub> concentrations and ensemble-based counterfactual  
 192 predictions from the XGBoost model, together with their 95% prediction intervals and  
 193 the corresponding deviations ( $\Delta = \text{observed} - \text{predicted}$ ).

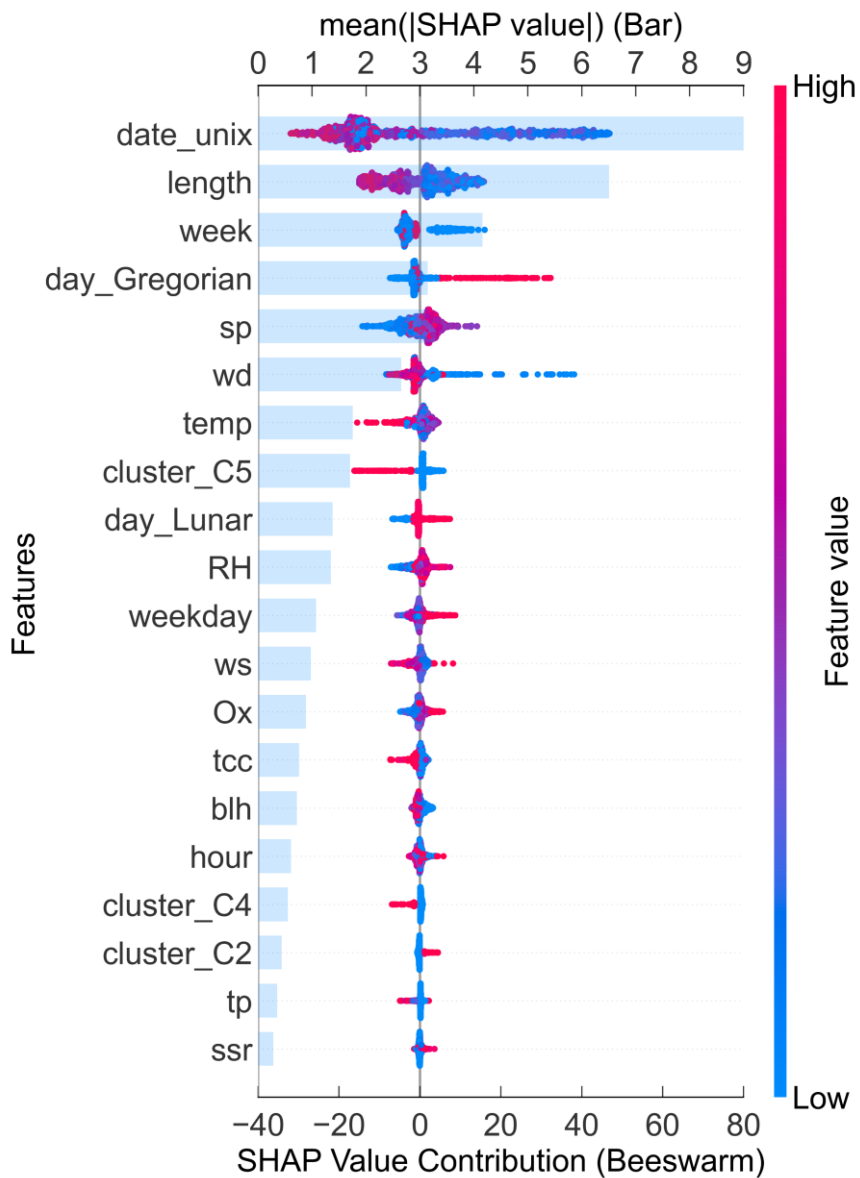

194

195 **Figure S3.** SHAP summary plots of feature contributions to the ML counterfactual  
 196 PM<sub>2.5</sub> model (upper: feature importance; lower: feature contributions).  
 197

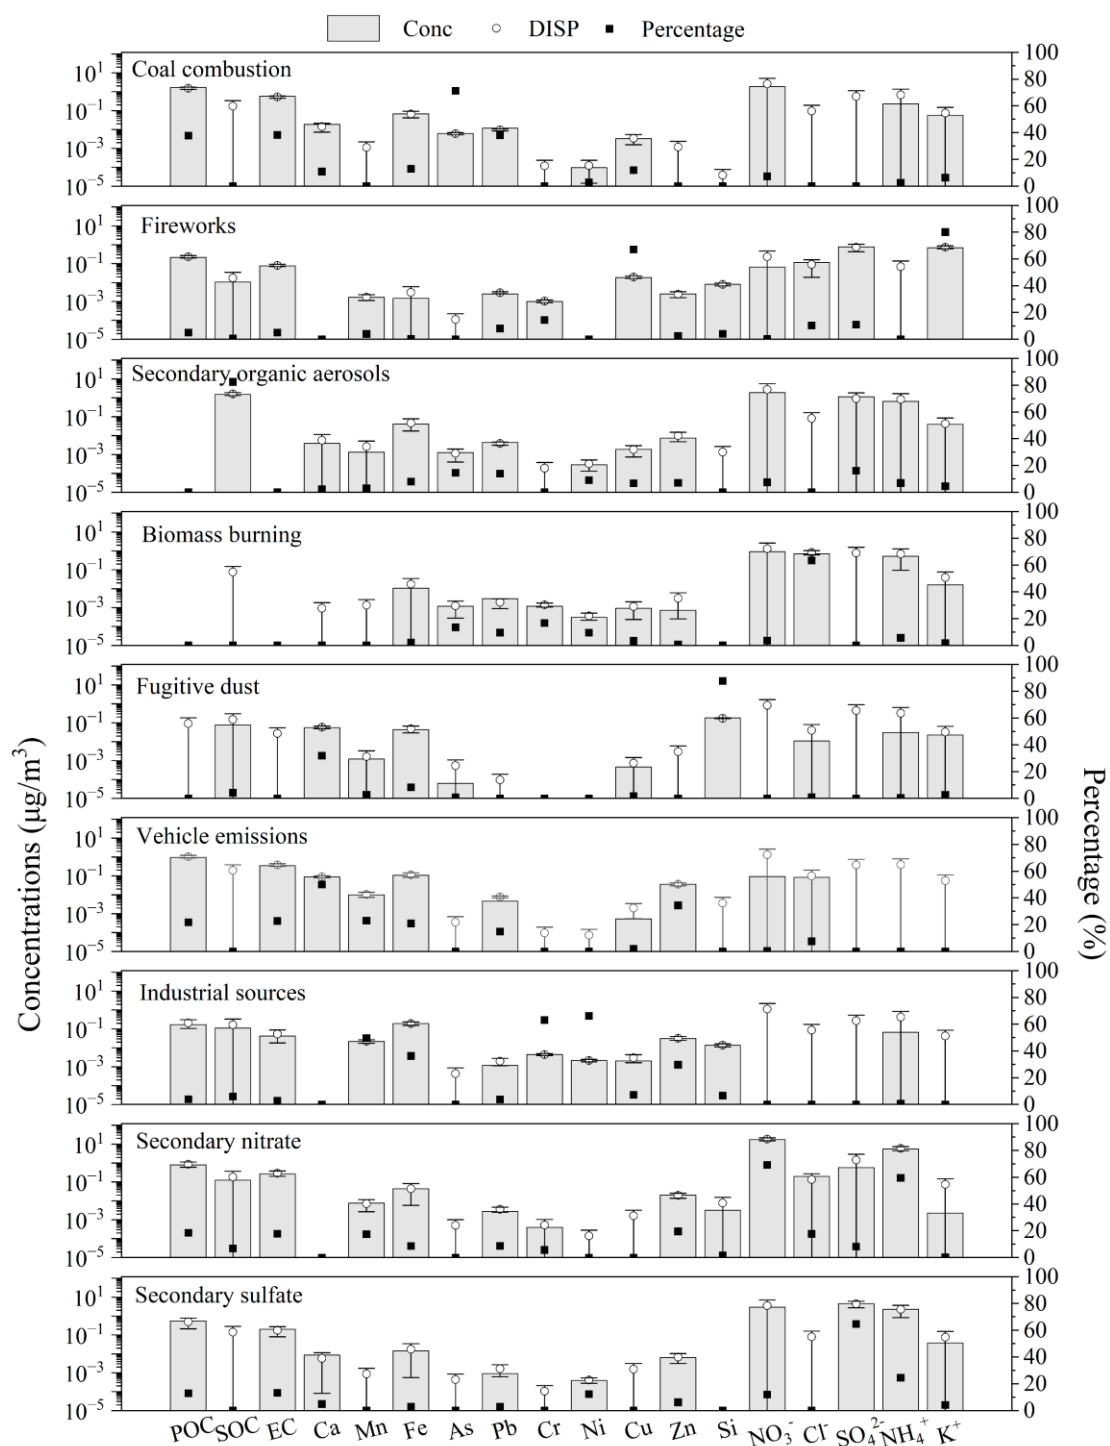

198

199 **Figure S4.** Source profiles of the nine factors resolved by the DN-PMF analysis for the  
 200 PM<sub>2.5</sub> pollution episode during New Year's Eve 2024 in Hangzhou. The gray bars  
 201 represent the species concentrations apportioned to each factor ( $\mu\text{g m}^{-3}$ ), open circles  
 202 denote the DISP-derived uncertainties, and black squares indicate the relative  
 203 contributions (%) of each species to the corresponding factor. The identified factors  
 204 include: coal combustion, fireworks, secondary organic aerosols (SOA), biomass  
 205 burning, fugitive dust, vehicle emissions, industrial sources, secondary nitrate, and  
 206 secondary sulfate.

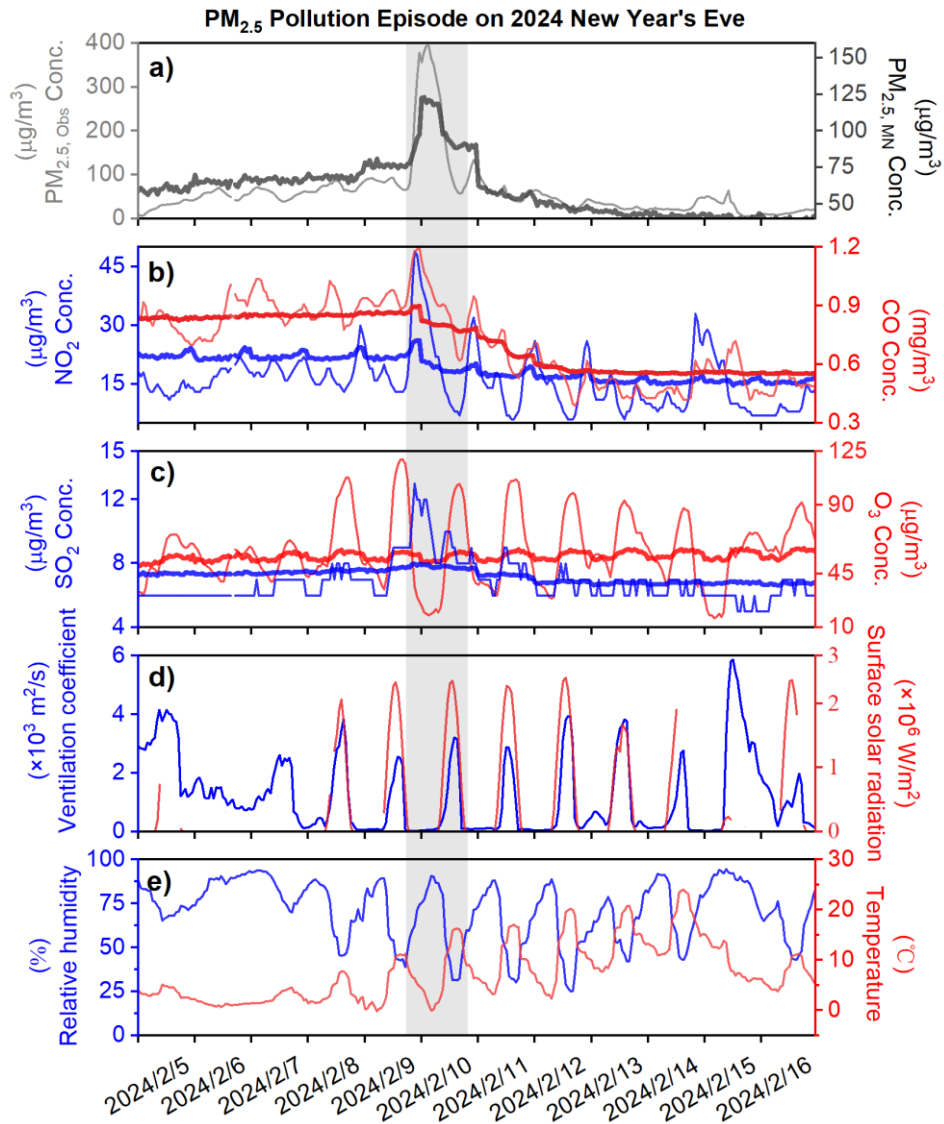

207

208 **Figure S5.** Temporal variations of air quality, meteorologically normalized  
 209 concentrations, and meteorological factors around the 2024 Spring Festival. In subplots  
 210 a, b, and c, the thin lines represent the observed values of pollutants, while the thick  
 211 lines indicate the meteorologically normalized concentrations.

212

213

214

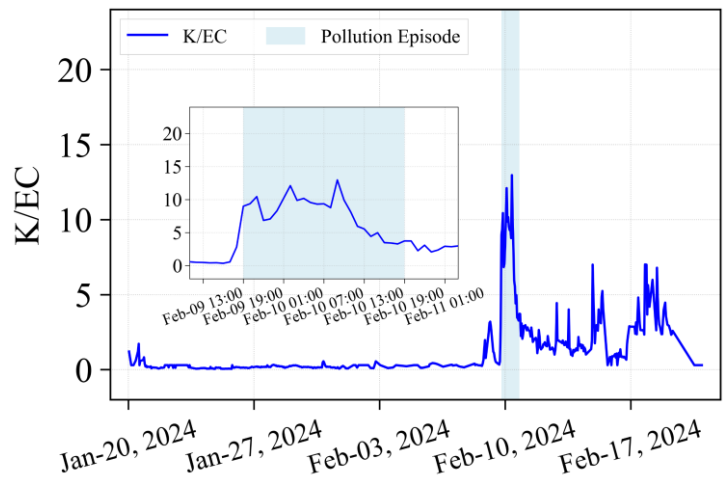

215  
216  
217  
218

**Figure S6.** A dramatic surge in the K/EC ratio of PM<sub>2.5</sub> during the 2024 New Year's Eve: Evidence for firework emissions in Hangzhou.

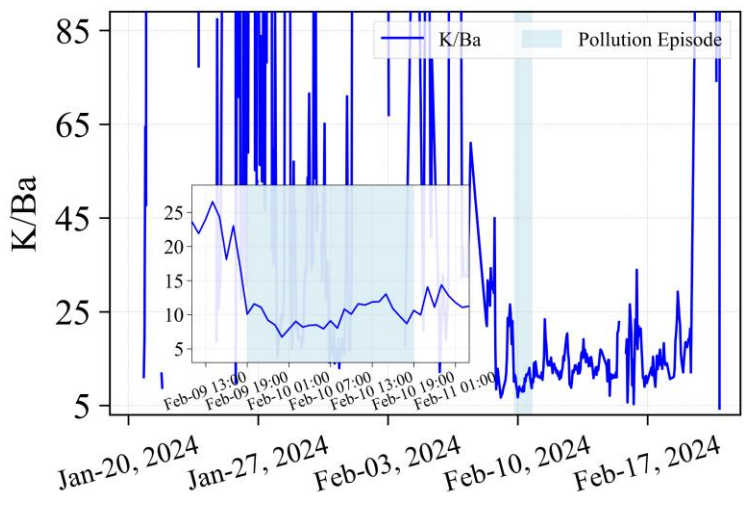

219  
220  
221  
222  
223  
224  
225  
226

**Figure S7.** Temporal variation of the K/Ba ratio in PM<sub>2.5</sub> during the 2024 New Year's Eve haze episode in Hangzhou.

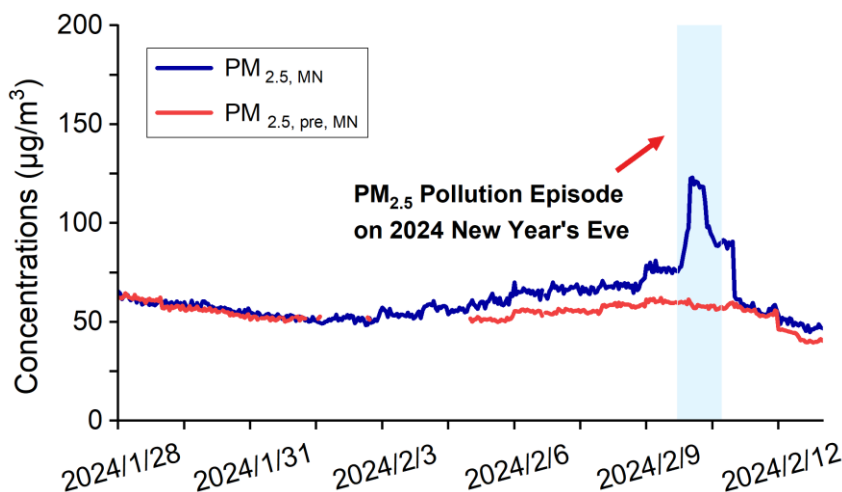

227

228 **Figure S8.** Temporal variations of  $PM_{2.5, MN}$  and  $PM_{2.5, pre, MN}$  around the 2024 Lunar  
 229 New Year's Eve in Hangzhou.

230

231

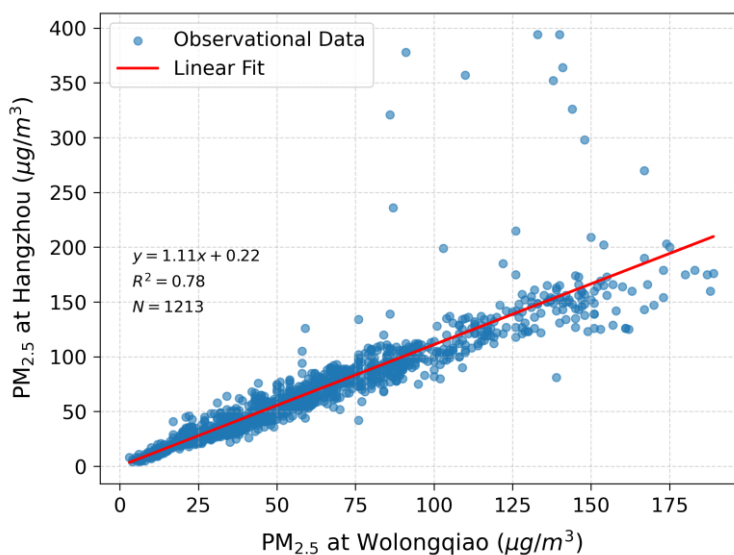

232

233 **Figure S9.** Linear regression analysis of hourly  $PM_{2.5}$  concentrations between the  
 234 Wolongqiao site (x-axis) and the Hangzhou city-wide average (14 sites, y-axis) during  
 235 the study period (2023/12/20 - 2024/2/20). The strong correlation ( $R^2 = 0.78$ ) supports  
 236 the representativeness of the Wolongqiao site in capturing city-scale pollution trends  
 237 during the observation period.

238

239

240

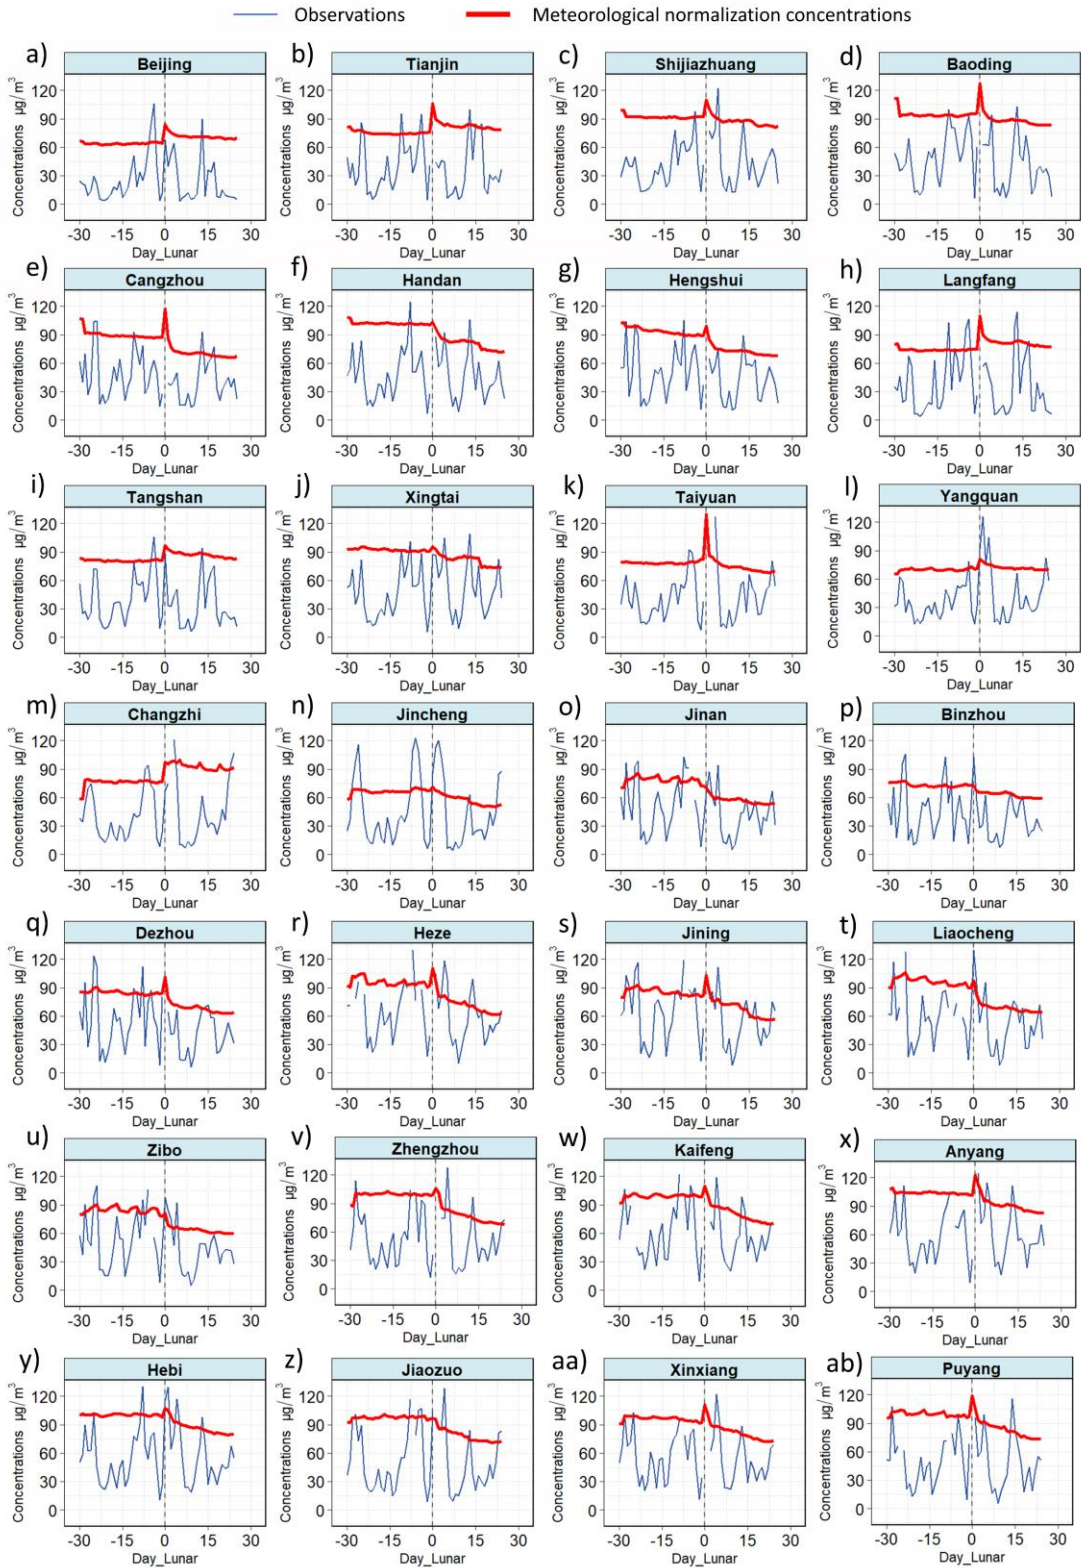

241  
 242 **Figure S10.** Temporal variations of observed and meteorologically normalized PM<sub>2.5</sub>  
 243 concentrations during the 2025 Spring Festival in the "2+26" cities of northern China.  
 244 The thick red line represents the meteorologically normalized concentration of PM<sub>2.5</sub>,  
 245 while the thin blue line indicates the observed concentration. The x-axis shows the lunar  
 246 calendar days, with 0 representing Chinese New Year's Eve and 1 representing the first  
 247 day of the Lunar New Year.

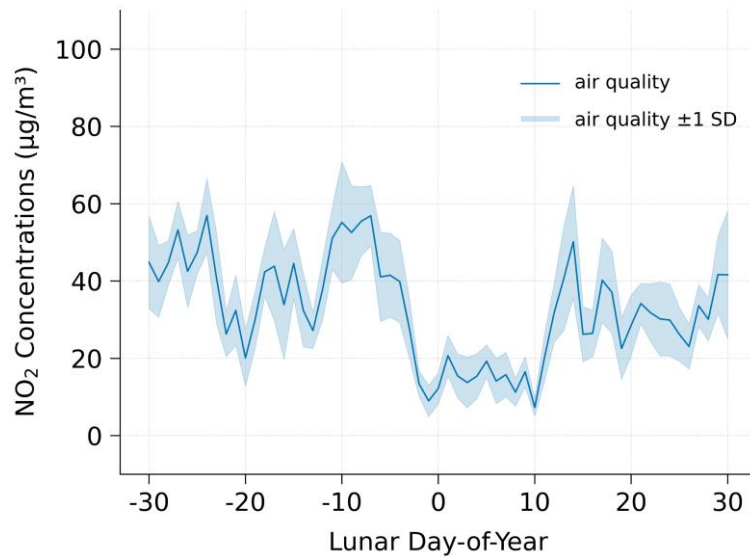

249

250 **Figure S11.** Temporal variation of NO<sub>2</sub> concentrations in the “2+26” cities of northern  
 251 China around the 2025 spring festival. The x-axis shows the lunar calendar days, with  
 252 0 representing Chinese New Year’s Eve and 1 representing the first day of the Lunar  
 253 New Year.

254

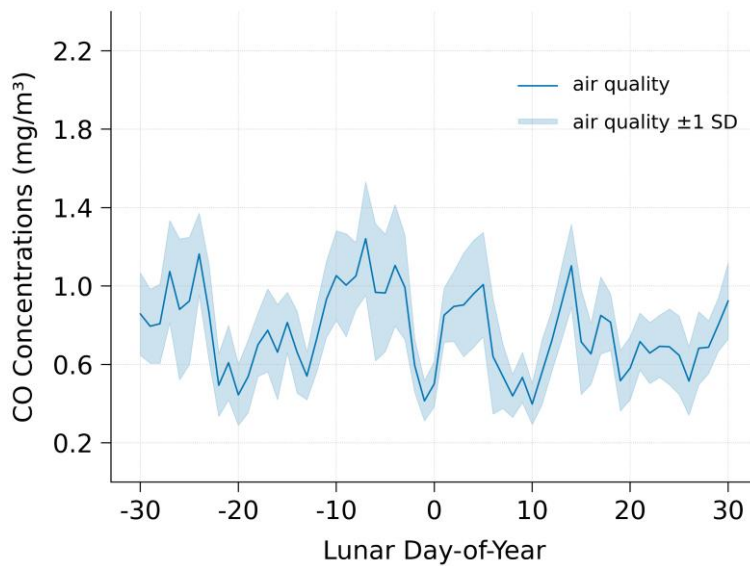

255

256 **Figure S12.** Temporal variation of CO concentrations in the “2+26” cities of northern  
 257 China around the 2025 spring festival. The x-axis shows the lunar calendar days, with  
 258 0 representing Chinese New Year’s Eve and 1 representing the first day of the Lunar  
 259 New Year.

260

261

262

263

264 **Reference:**

- 265 Emanuel, K.A., 1994. Atmospheric convection. Oxford University Press.  
266 Hersbach, H., Bell, B., Berrisford, P., Hirahara, S., Horányi, A., Muñoz-Sabater, J.,  
267 Nicolas, J., Peubey, C., Radu, R., and Schepers, D.: The ERA5 global reanalysis, Q. J.  
268 Roy. Meteorol. Soc., 146, 1999-2049, <https://doi.org/10.1002/qj.3803>, 2020.
